# Supplementary material for: Nitrogen-doped graphene–TiOxNy nanocomposite electrode for highly efficient capacitive deionization
Source: Royal Society of Chemistry journal article supplement (doi:10.1039/c9ra05380h), 2019-01-01
Supplement: c9ra05380h1.pdf [file c9ra05380h1.pdf]

## Supplementary Information

# Nitrogen-Doped Graphene-TiO<sub>x</sub>N<sub>y</sub> Nanocomposite Electrode for Highly Efficient Capacitive Deionization

Yuchen Wu<sup>a,b</sup>, Gaopeng Jiang<sup>b</sup>, Qian Li<sup>b</sup>, Zisheng Zhang<sup>\*a</sup> and Zhongwei Chen<sup>\*b</sup>

- a. Department of Chemical and Biological Engineering, University of Ottawa, 161 Louis Pasteur Private, Ottawa, Ontario K1N 6N5, Canada. Email: Jason.zhang@uottawa.ca
- b. Department of Chemical Engineering, University of Waterloo, 200 University Ave W, Waterloo, Ontario N2L 3G1, Canada. E-mail: zhwchen@uwaterloo.ca,

## Table of Contents

|                                            |    |
|--------------------------------------------|----|
| Calibration of SCE electrode .....         | 3  |
| Calibration of conductivity-salinity ..... | 4  |
| Supporting XRD information.....            | 5  |
| Supplemental SEM information.....          | 6  |
| Supplemental XPS wide survey.....          | 7  |
| Supplemental Ti 2p scan information.....   | 8  |
| Schematic of a flow-by CDI process.....    | 9  |
| Supplemental Tables .....                  | 10 |

## Calibration of SCE electrode

The SCE electrode was calibrated in NaCl solution using SCE to Reversible Hydrogen Electrode (RHE) in an open circuit as shown in **Fig. S2**. The result was adding +0.5V to the potential of SCE in NaCl solution, which means the -1V to 0V was -0.5V to 0.5V in actual.

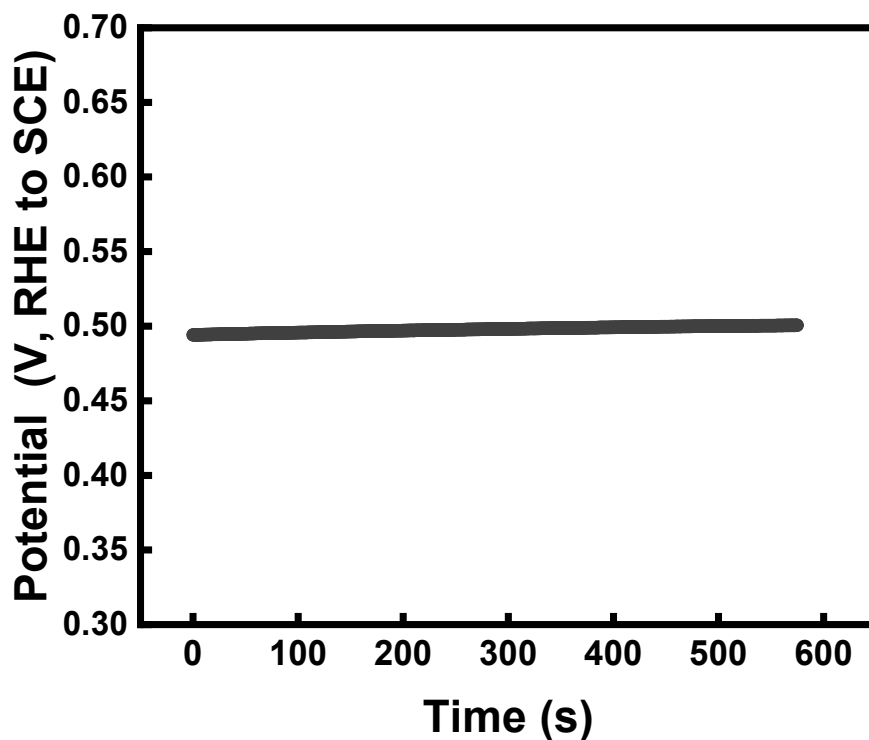

Fig. S1 Open circuit plot of SCE to RHE vs time.

## Calibration of conductivity-salinity

The salinity of the water is based on a series calibration with a series of standard NaCl solution.

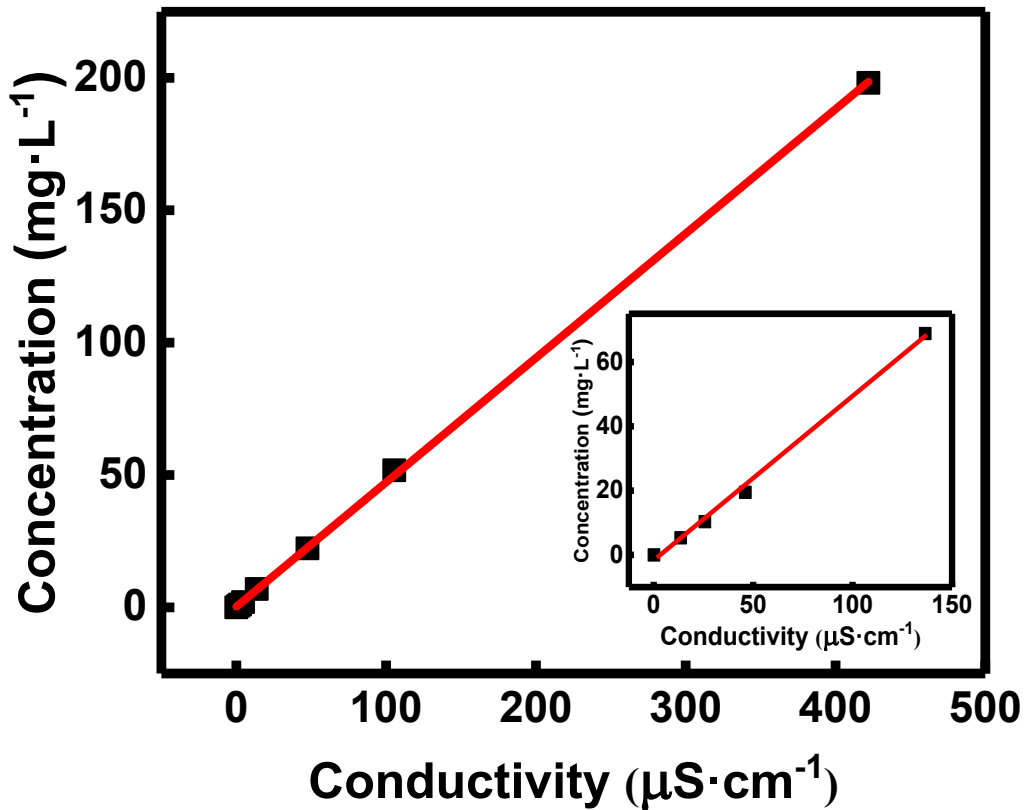

**Fig. S2** calibration of the Conductivity to NaCl Concentration. The inserted graph is the enlarged part from 0-300  $\mu\text{S}/\text{cm}^2$ .

The calibrated **Equation 1** of Conductivity-Concentration is:

$$C = 2.33873 * \text{Conductivity}(\mu\text{S}) + 3.60607 \#(1)$$

Where the  $R^2=0.99993$ , indicating that the salinity of the solution can be considered as a linear dependent to the conductivity.

## Supporting XRD information

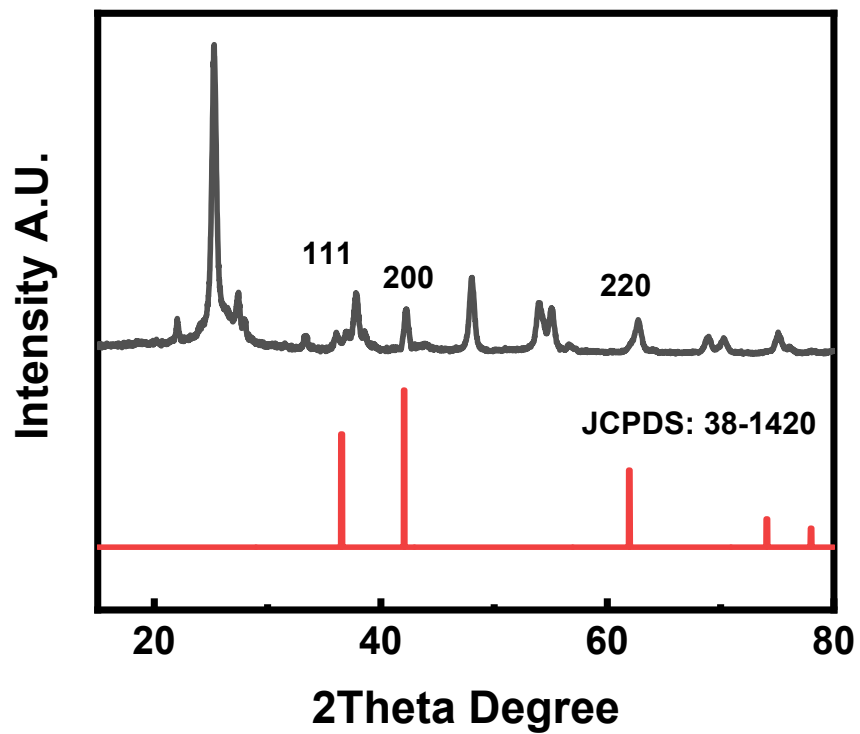

Fig. S3 XRD Patterns of NG-TiO<sub>x</sub>N<sub>y</sub> and JCPDS card of TiN

**Supplemental SEM information**

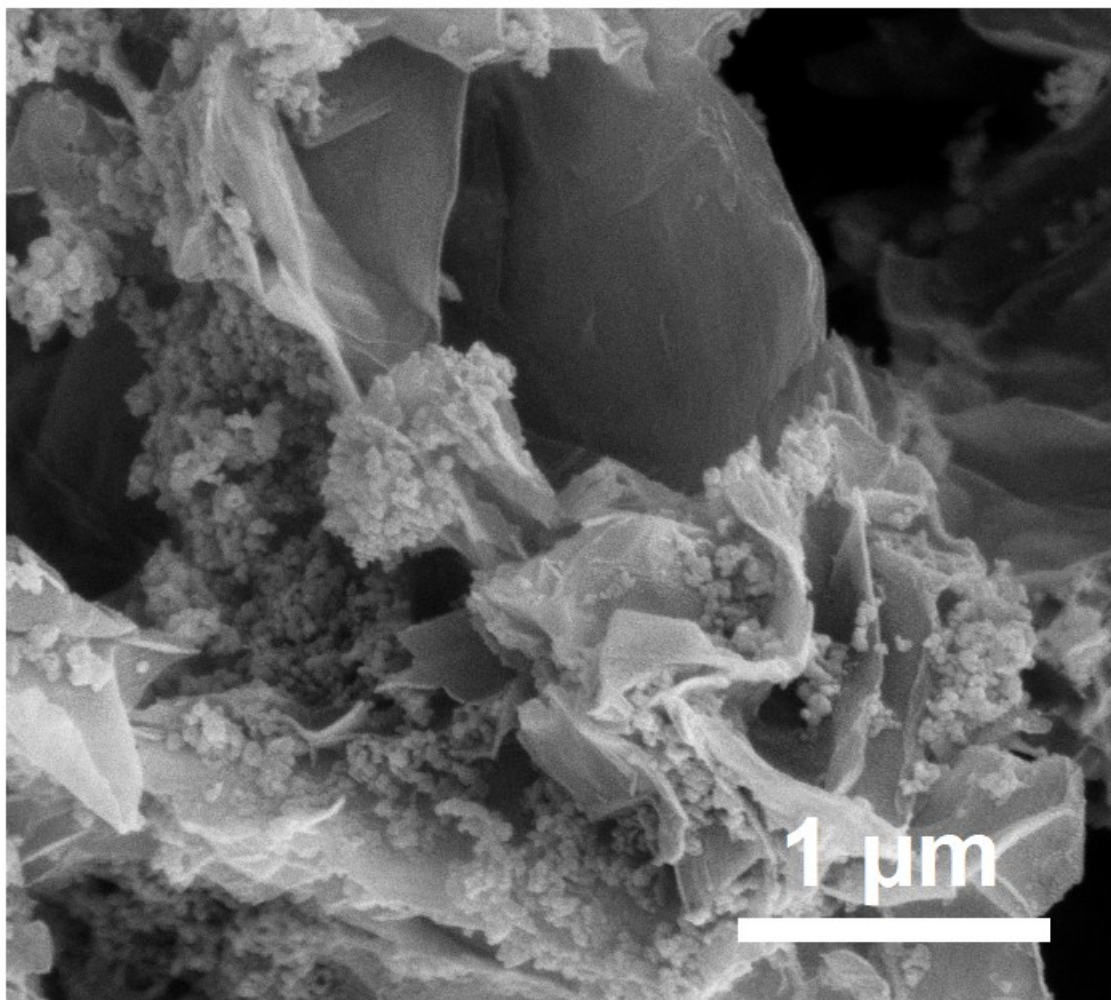

**Fig. S4** Low magnification SEM image of the NG-TiO<sub>x</sub>N<sub>y</sub>.

Supplemental XPS wide survey

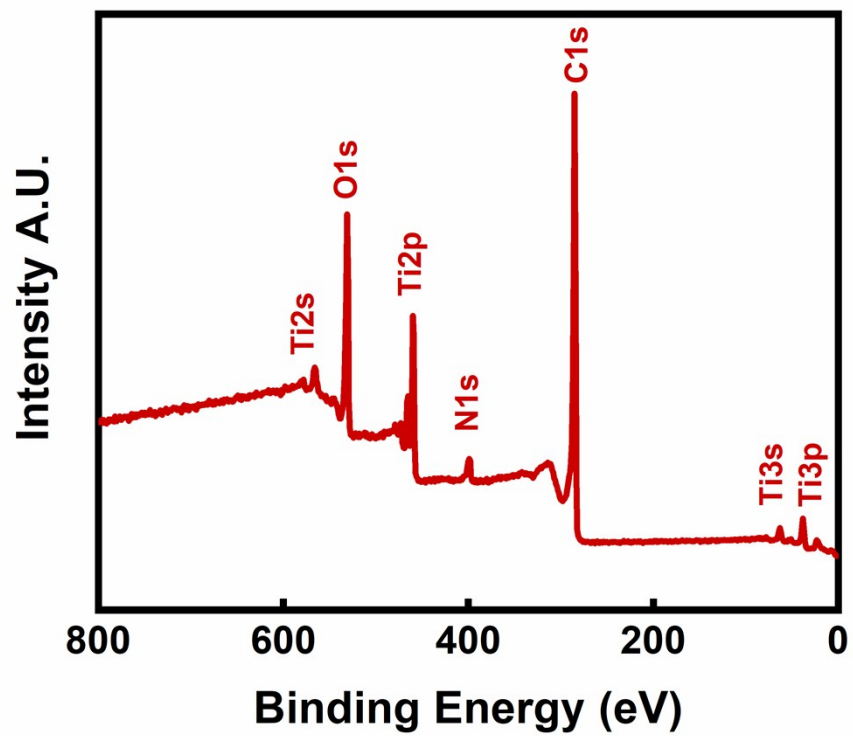

Fig. S5 XPS survey of the NG-TiO<sub>x</sub>N<sub>y</sub>.

## Supplemental Ti 2p scan information

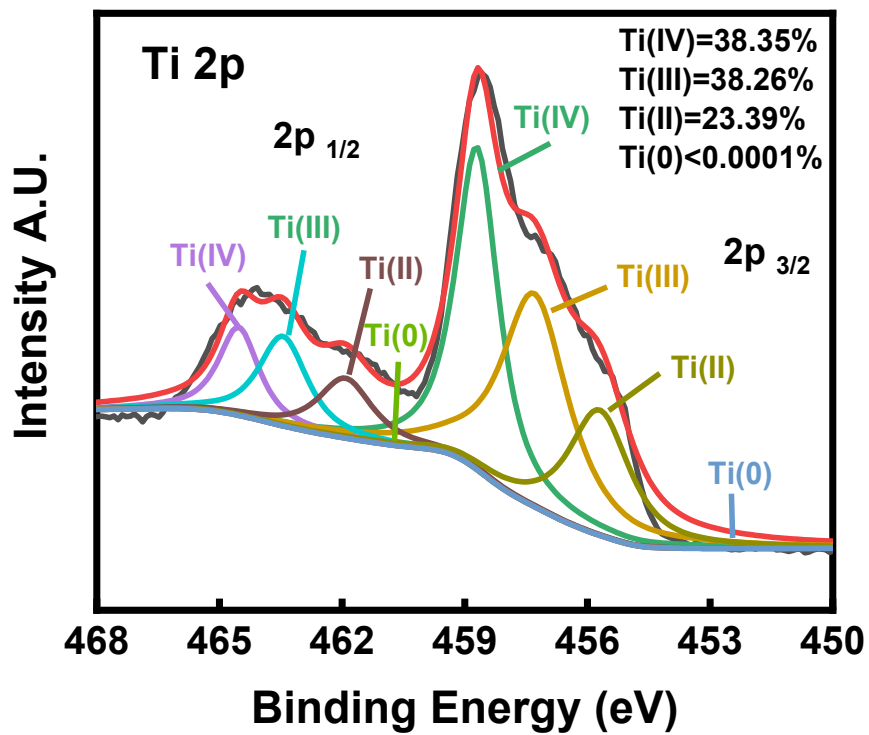

Fig. S6 Ti 2p XPS analysis of various Ti states.



## Schematic of a flow-by CDI process

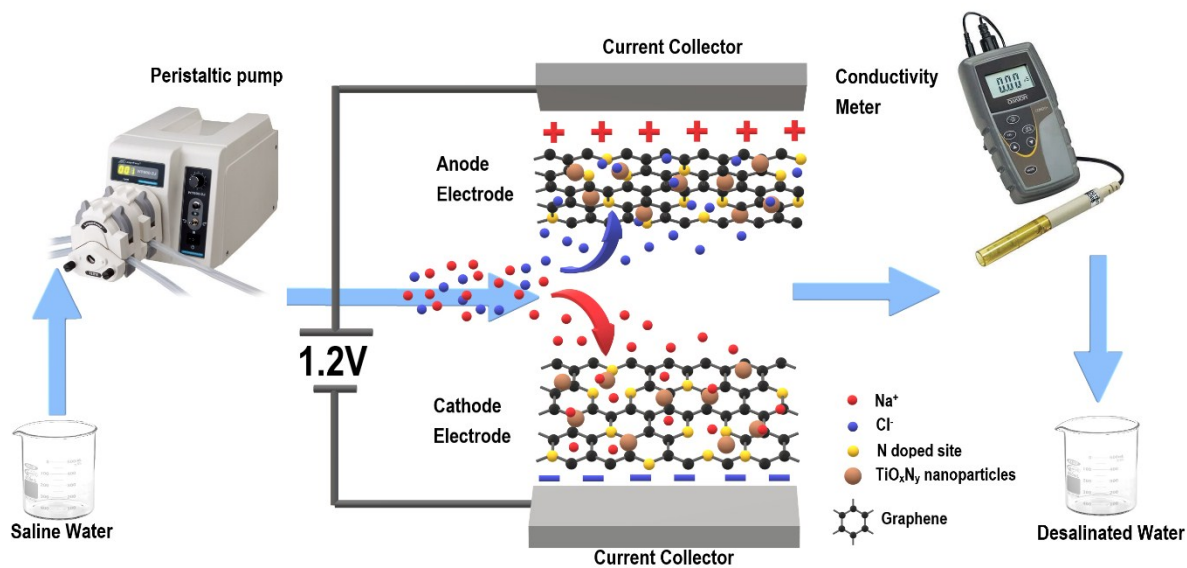

Fig. S7 Schematic of a flow-by CDI process

## Supplemental Tables

**Table S1** Lattice constants and N/Ti ratio of NG-TiO<sub>x</sub>N<sub>y</sub>.

|                                    | 2θ/°   | d <sub>(220)</sub> / Å | a / Å  | y      |
|------------------------------------|--------|------------------------|--------|--------|
| NG-TiO <sub>x</sub> N <sub>y</sub> | 62.371 | 1.490                  | 4.2211 | 0.6122 |

In this study, we conducted the nitridation process by the ammonia treatment of solid rGO-TiO<sub>2</sub> rather than the gaseous titanium precursor such as titanium tetrachloride. Thus, the nitridation is insufficient and the degree of nitridation is relatively low. Here, we made an attempt to calculate N/Ti ratio (y) using the reported method and XRD data listed in **Table S1**.<sup>1</sup>

The d<sub>220</sub> is determined according to Bragg's law:

$$d_{220} = \frac{n\lambda}{2\sin\theta}$$

TiN lattice parameter is then calculated:

$$a_{TiN_y} = d_{220}\sqrt{h^2 + k^2 + l^2}$$

From the obtained values of lattice parameters, the N/Ti ratio of TiO<sub>x</sub>N<sub>y</sub> in NG-TiO<sub>x</sub>N<sub>y</sub> is calculated:

$$a_{TiN_y} = 4.1925 + 0.0467y$$

Thus, the value of y is roughly 0.61 in the NG-TiO<sub>x</sub>N<sub>y</sub> nanocomposite. However, there is no fixed stoichiometry between nitrogen and titanium in titanium nitride. The N/Ti ratio varies from 0.6 to 1.2 and depends on the degree of nitridation.<sup>2</sup> In our design, the mass ratio of GO to TiO<sub>2</sub>, the mass of rGO-TiO<sub>2</sub> charged in the ceramic boat, the porosity and morphology of rGO-TiO<sub>2</sub> as well as other experimental factors may affect the degree of nitridation. Thus, the value of y varies from sample to sample and from batch to batch.

**Table S2** Oxidization states and atom percentage of Ti species in NG-TiO<sub>x</sub>N<sub>y</sub>.

| <i>i</i>       | Ti (IV) | Ti (III) | Ti (II) | Ti (0) |
|----------------|---------|----------|---------|--------|
| $O_{Ti(i)}$    | +4      | +3       | +2      | 0      |
| $P_{Ti(i)}/\%$ | 38.35   | 38.26    | 23.39   | ~0     |

According to Fig. R1, four different oxidation states were observed for Ti in NG-TiO<sub>x</sub>N<sub>y</sub>, namely Ti(IV), Ti(III), Ti(II) and Ti(0).<sup>3, 4</sup> The average oxidation state of titanium is calculated via the following equation:

$$Ti_{average} = \sum (O_{Ti(i)} \times P_{Ti(i)})$$

Where the  $O_{Ti(i)}$  and  $P_{Ti(i)}$  are the oxidation state and corresponding atom percentage of each Ti species. The values are listed in the above **Table S2**.

Thus, the calculated average oxidation state of Ti is +3.1497.

It is assumed that the oxidation states of all the nitrogen ( $O_N$ ) and oxygen ( $O_O$ ) that were bonded with Ti in the NG-TiO<sub>x</sub>N<sub>y</sub> composite are -3 and -2, respectively. Then, with the N/Ti ratio ( $y$ ) calculated as 0.6122, the value of  $x$  can be calculated as follows:

$$x = - \frac{Ti_{average} + y * O_N}{O_O}$$

Then, we obtained the value of  $x$  as 0.6565, roughly 0.66.

## References

1. V. Valvoda, R. Černý, R. Kužel, J. Musil and V. Poulek, *Thin Solid Films*, 1988, **158**, 225-232.
2. L. Toth, *Transition metal carbides and nitrides*, Elsevier, 2014.
3. M. C. Biesinger, B. P. Payne, B. R. Hart, A. P. Grosvenor, N. S. McIntyre, L. W. Lau and R. S. Smart, 2008.
4. M. C. Biesinger, B. P. Payne, A. P. Grosvenor, L. W. Lau, A. R. Gerson and R. S. C. Smart, *Applied Surface Science*, 2011, **257**, 2717-2730.
